# Supplementary material for: Metformin Restores CNS Remyelination Capacity by Rejuvenating Aged Stem Cells
Source: PubMed Central journal article supplement (PMC6863391; doi:10.1016/j.stem.2019.08.015), 2019-10-03
Supplement: mmc1.pdf [file mmc1.pdf]

**Cell Stem Cell, Volume 25**

**Supplemental Information**

**Metformin Restores CNS Remyelination Capacity**

**by Rejuvenating Aged Stem Cells**

**Björn Neumann, Roey Baror, Chao Zhao, Michael Segel, Sabine Dietmann, Khalil S. Rawji, Sarah Foerster, Crystal R. McClain, Kevin Chalut, Peter van Wijngaarden, and Robin J.M. Franklin**

**A**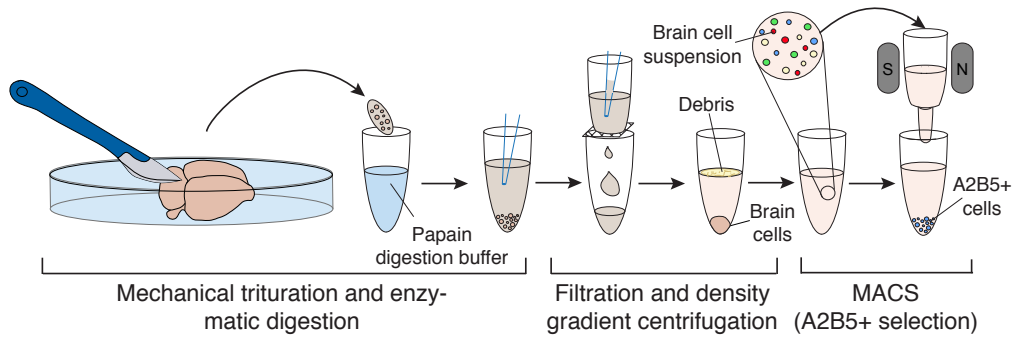**B**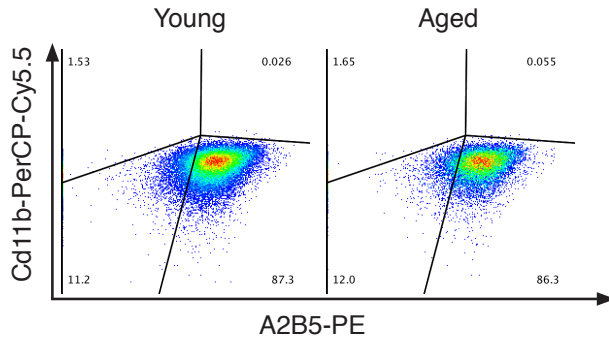**C**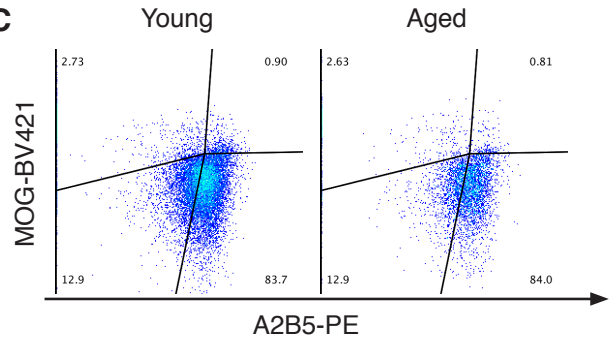**D**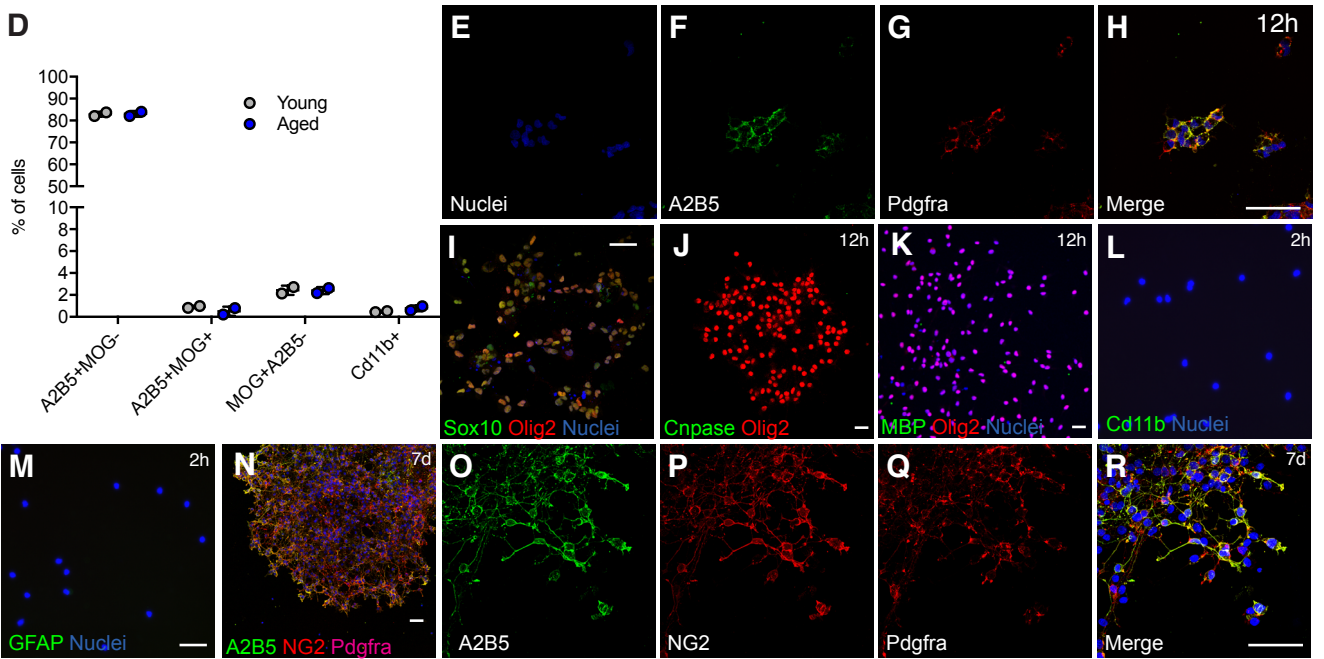

**Figure S.1. Related to Figure 1. Isolation and culture of adult OPCs from aged rats. (A),** Schematic illustration of the adult OPC isolation workflow. **(B-C),** Representative density plots of FACS data from freshly isolated cells stained for A2B5 (OPC marker) and Cd11b (microglia marker) **(B)**, and A2B5 and MOG (oligodendrocyte marker) **(C)**. **(D),** Quantification of FACS data presented in B and C (n=2 biological repeats). **(E-H),** A2B5<sup>+</sup> sorted cells are positive for OPC markers A2B5 and Pdgfra. **(I),** More than 90% of A2B5 cells are positive for Sox10 and Olig2. **(J-K),** A2B5 sorted cells do not express more mature lineage markers such as CNPase or MBP. **(L-M),** The A2B5<sup>+</sup> population does not contain significant contamination from other glia cells such as Cd11b<sup>+</sup> microglia **(L)**, or GFAP<sup>+</sup> astrocytes **(M)**. **(N),** In the presence of PDGF-AA and b-FGF, A2B5<sup>+</sup> isolated cells form colonies of mostly bipolar cells that express the OPC markers A2B5, NG2 and Pdgfra. **(O-R),** Higher magnification of A2B5, NG2, Pdgfra cells. Images in E-Q are taken from cultures of aged OPCs (≥18 months). Scale bar = 50μm.

**A**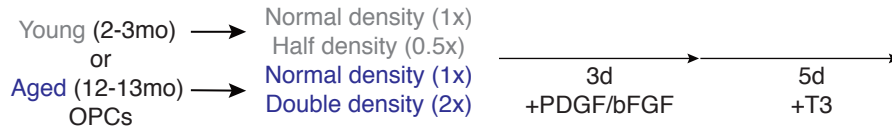**B**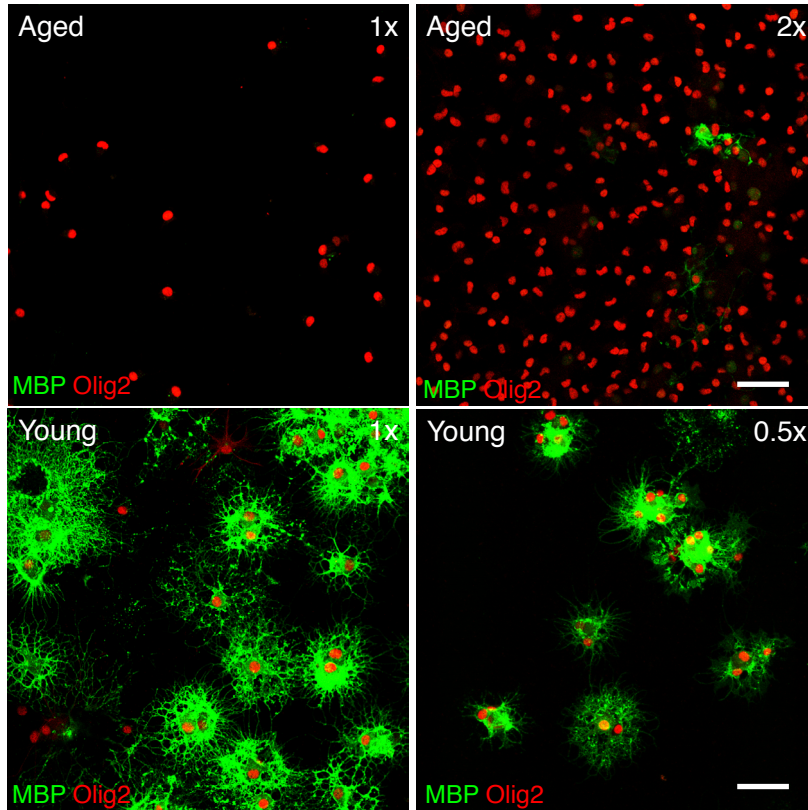**C**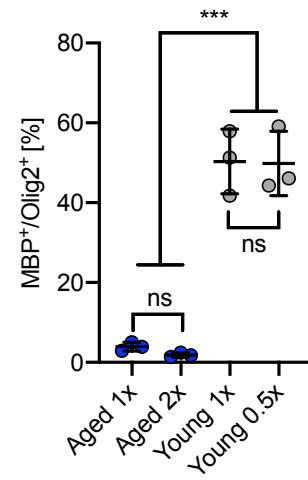**D**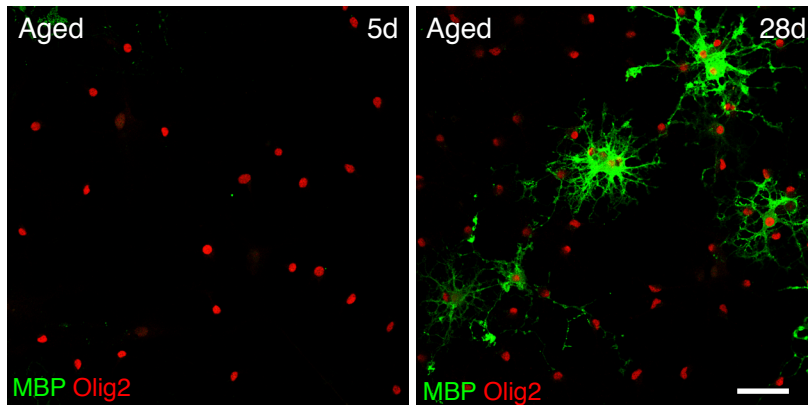**E**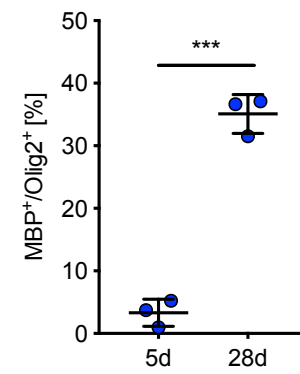



**Figure S.2. Related to Figure 1. Density changes do not alter the differentiation rate of OPCs.**

**(A)** Schematic of the experimental design. Young (2-3 months old) or aged OPCs (18-20 months) were recovered in growth factor-supplemented (PDGF-AA and b-FGF) medium for 3d and were then subjected to pro-differentiation compounds for 5d. Young OPCs were seeded in the regular or half the density. Aged OPCs were seeded in the regular or double density. **(B)**, Representative images of the differentiation assay. Newly formed oligodendrocytes were identified as Olig2<sup>+</sup>MBP<sup>+</sup> cells. **(C)**, Quantification of the differentiation assay. All data are presented as mean  $\pm$  SD (n=3 biological replicates, One Way ANOVA with Dunnett's multiple comparison test for each group against each other). **(D)** Aged OPCs (18-20 months) were cultured as described above. Differentiation was assessed 5d or 28d after removal of growth factors and addition of T3. Newly formed oligodendrocytes were identified as Olig2<sup>+</sup>MBP<sup>+</sup> cells. **(E)** Quantification of the differentiation assay. All data are presented as mean  $\pm$  SD (n=3 biological replicates, two-tailed t-test). All scale bars = 50 $\mu$ m. \*P<0.05, \*\*P<0.01, \*\*\*P<0.001.

**A**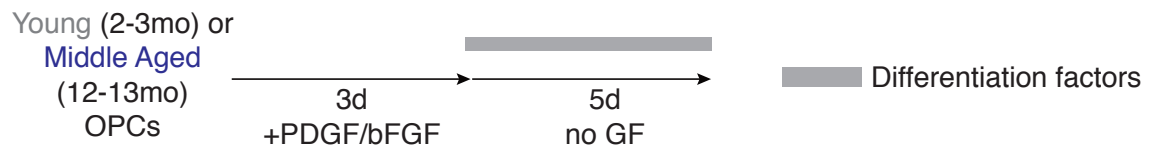**B**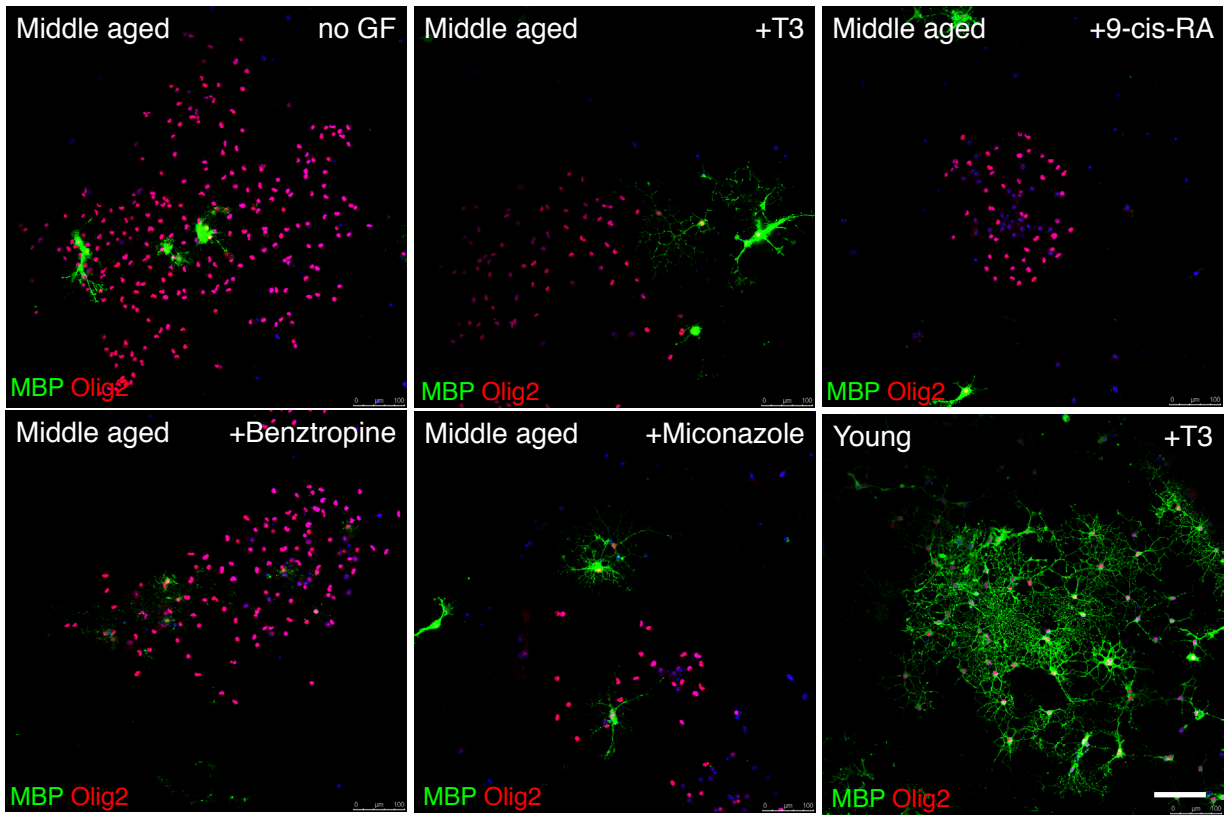**C**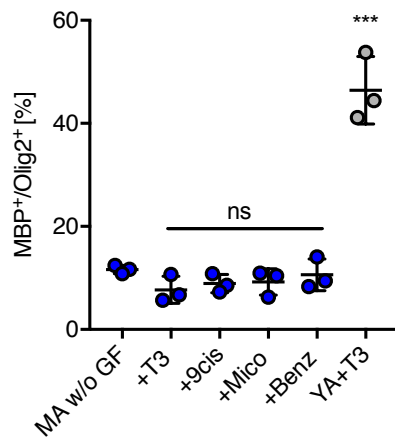

**Figure S.3. Related to Figure 1 and 3. Middle aged OPCs lose their inherent differentiation potential and responsiveness to pro-differentiation compounds. (A),** Schematic of the experimental design. Young (2-3 months old) or middle aged OPCs (12-13 months old) were recovered in growth factor-supplemented (PDGF-AA and b-FGF) medium for 3d and were then subjected to pro-differentiation compounds for 5d. **(B),** Representative images of the differentiation assay. Newly formed oligodendrocytes were identified as Olig2<sup>+</sup>MBP<sup>+</sup> cells. Scale bar = 50μm. **(C),** Quantification of the differentiation assay. All data are presented as mean ± SD (n=3 biological replicates, One Way ANOVA with Dunnett's multiple comparison test for each group against the middle aged group differentiating in the absence of growth factors "MA"). \*P<0.05, \*\*P<0.01, \*\*\*P<0.001.

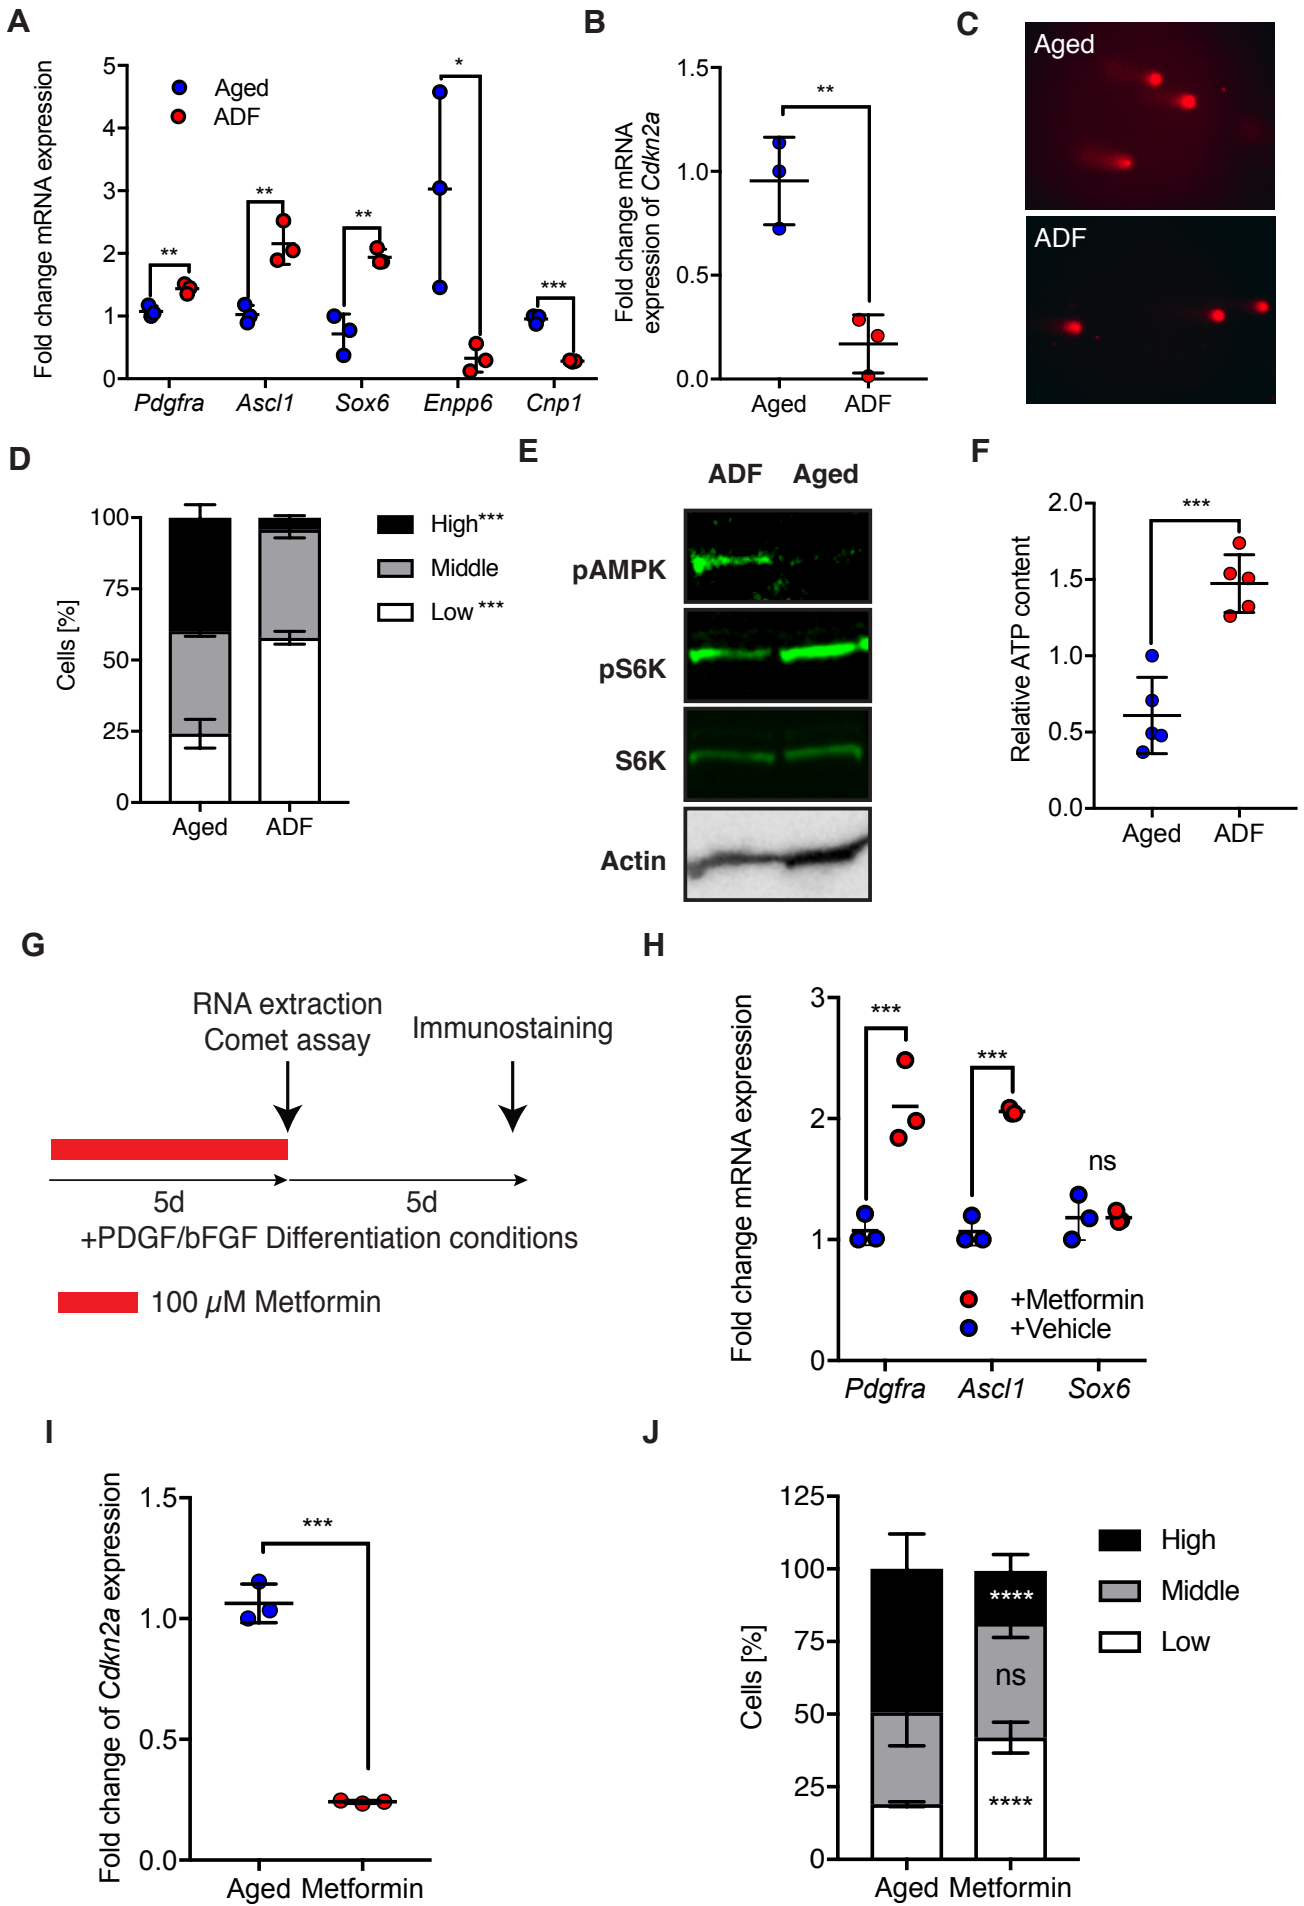

**Figure S.4. Related to Figure 3 and 4. ADF and treatment of aged OPCs with metformin in vitro reverses hallmarks of ageing.** Animals were exposed to alternate day fasting or fed *ad libitum* as described in Figure 3. At 18 months of age OPCs were isolated from both experimental groups. **(A)**, qRT-PCR for OPC genes and **(B)**, *Cdkn2a*. All data are presented as mean  $\pm$  SD (n=3 biological replicates, two-tailed t-test). **(C)**, Representative images of comet assay data. **(D)**, Quantification of comet assays. All data are presented as mean  $\pm$  SD (n=3 biological replicates, two tailed t-test comparing each damage category between the two groups, i.e. Aged Low vs ADF Low). **(E)**, Representative Western Blot data from acutely isolated OPCs from aged (18 months) and ADF animals (18 months). n=2 biological repeats for each experimental group. **(F)**, Quantification of normalised intracellular ATP content (n=5 biological repeats for each experimental group). **(G)**, OPCs were isolated from aged animals ( $\geq$ 18 months) and cultured in the presence of growth factors for 5 days. Some cells were treated with 100 $\mu$ M metformin with each medium change during the first 5 days (“metformin” days 2 and 4), whereas control cells (“Aged”) received medium alone. **(H)**, qRT-PCR for OPC genes (*Pdgfra*, *Ascl1* and *Sox6*) and **(I)**, *Cdkn2a*. All data are presented as mean  $\pm$  SD (n=3 biological replicates for each group, two-tailed t-test). **(J)**, Quantification of comet assays. All data are presented as mean  $\pm$  SD (n=3 biological replicates for each group, two-tailed t-test comparing each damage category between the two experimental groups, i.e Aged Low and Metformin low). \*P < 0.05, \*\*P<0.01, \*\*\*P<0.001, ns P>0.05

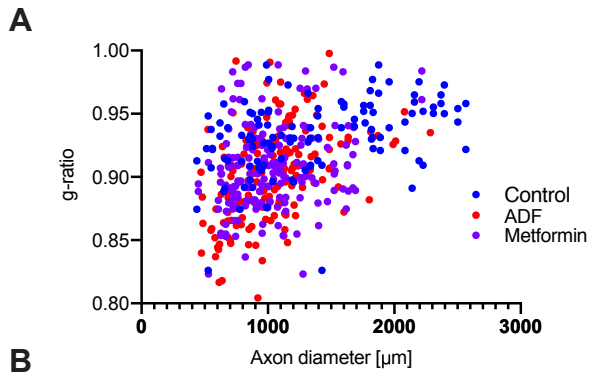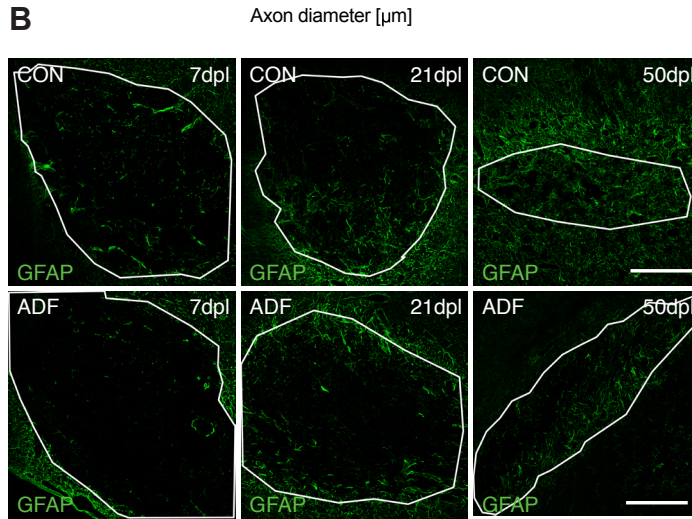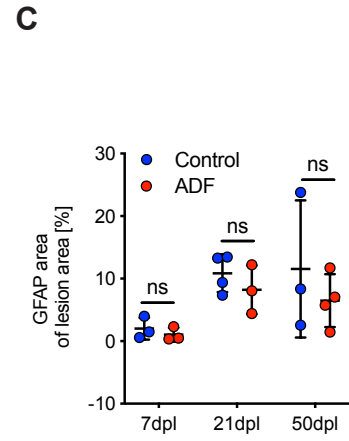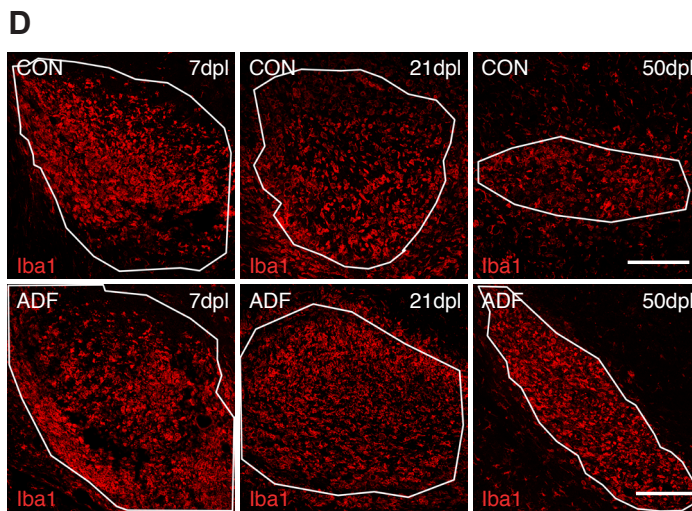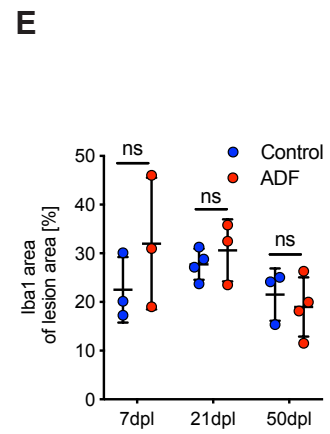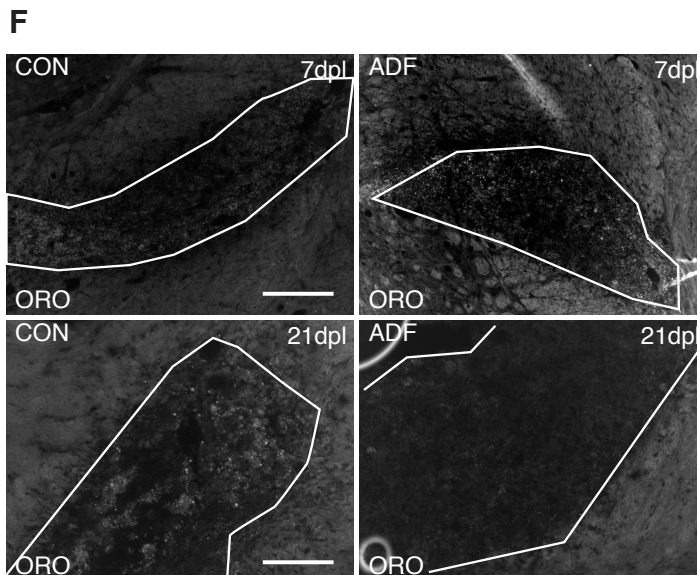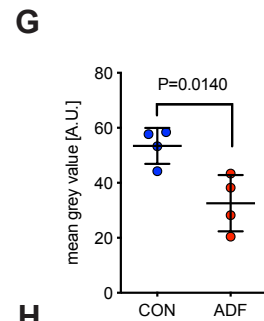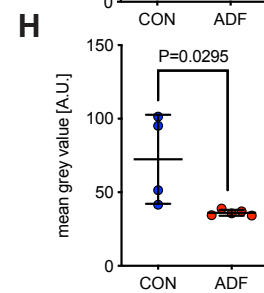

**Figure S.5. Related to Figure 3. Additional analysis about remyelinating lesions. (A),** G-ratio analysis of ADF, Control and Metformin remyelinated axons. **(B),** Representative images of lesions stained for the reactive astrocyte marker GFAP at 7,21 and 50dpl. **(C),** Quantification of the area within a lesion covered by GFAP. **(D),** Representative images of lesions stained for the macrophage and microglia marker Iba1 at 7,21 and 50dpl. **(E),** Quantification of the area within a lesion covered by Iba1. **(F, H),** Representative images of lesions stained Oil-Red-O to visualise myelin debris at 7dpl (F) and 21dpl (H). **(G, I),** Quantification of the myelin debris load in a lesion at 7dpl (G, n= 4 biological repeats, two-tailed t-test) and 21dpl (I, n=4 biological repeats, two-tailed t-test). All scale bars: 100µm. ns: P>0.05

**A**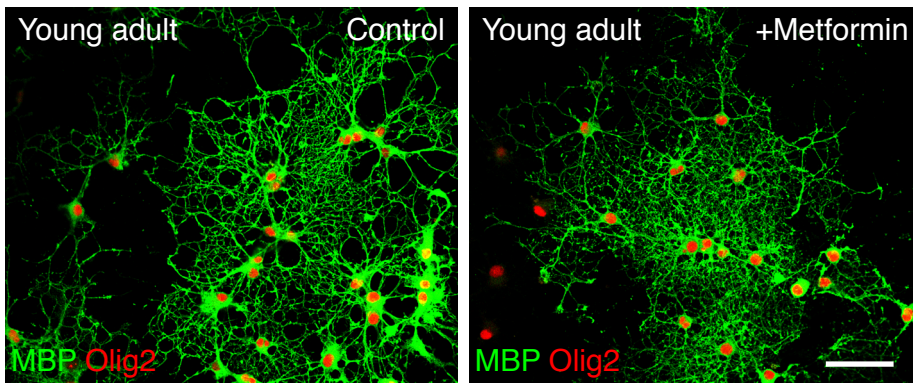**B**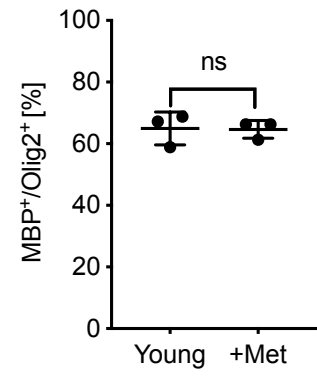



**Figure S.6. Related to Figure 4. Metformin does not accelerate the differentiation of young OPCs. (A)** Young OPCs (2-3 months old) were recovered in growth factor-supplemented (PDGF-AA and b-FGF) medium for 3d and were then differentiated for 5d. Metformin treated cells were exposed to metformin throughout the whole culture period. Newly formed oligodendrocytes were identified as Olig2<sup>+</sup>MBP<sup>+</sup> cells. **(B)** Quantification of the differentiation assay. All data are presented as mean  $\pm$  SD (n=3 biological replicates, two-tailed t-test). All scale bars = 50 $\mu$ m. ns: P>0.05.

**SI Table 1. Log2 transformed RNAseq expression data for characteristic OPC genes between young and aged OPCs. Related to Figure 2A.**

**SI Table 2. Ingenuity Pathway analysis results for genes significantly higher expressed in aged versus young OPCs. Related to Figure 2C.**

**SI Table. 3. Formulation of isolation medium. Related to STAR Methods.** All chemicals were purchased from Sigma. pH was adjusted to 7.3 and the medium was filtered (0.22µm) and stored at 4°C.

| <b>Amino Acids</b>                                                        | <b>µM</b> | <b>MW</b> | <b>mg/5l</b> |
|---------------------------------------------------------------------------|-----------|-----------|--------------|
| Glycine                                                                   | 400       | 75.07     | 150.1        |
| L-Alanine                                                                 | 22        | 89.09     | 9.8          |
| L-Arginine hydrochloride                                                  | 483       | 174.2     | 420.7        |
| L-Asparagine-H <sub>2</sub> O                                             | 5.5       | 150.13    | 4.1286       |
| L-Cysteine hydrochloride-H <sub>2</sub> O                                 | 7.7       | 313.2     | 12.06        |
| L-Histidine hydrochloride-H <sub>2</sub> O                                | 200       | 209.6     | 209.6        |
| L-Isoleucine                                                              | 802       | 131.2     | 526.1        |
| L-Leucine                                                                 | 802       | 131.2     | 526.1        |
| L-Lysine hydrochloride                                                    | 798       | 146.2     | 583.3        |
| L-Methionine                                                              | 201       | 149.2     | 149.9        |
| L-Phenylalanine                                                           | 400       | 165.2     | 330.4        |
| L-Proline                                                                 | 67        | 115.13    | 38.569       |
| L-Serine                                                                  | 400       | 105       | 210          |
| L-Threonine                                                               | 798       | 119       | 474.8        |
| L-Tryptophan                                                              | 78        | 204.2     | 79.6         |
| L-Tyrosine disodium salt dihydrate                                        | 398       | 181.2     | 360.6        |
| L-Valine                                                                  | 803       | 117.2     | 470.6        |
| <b>Vitamins</b>                                                           |           |           |              |
| Choline chloride                                                          | 28        | 139.62    | 19.55        |
| D-Calcium pantothenate                                                    | 8         | 238.27    | 9.53         |
| Niacinamide                                                               | 30        | 122       | 18.3         |
| Pyridoxine hydrochloride                                                  | 20        | 206       | 20.6         |
| Thiamine hydrochloride                                                    | 10        | 337       | 16.9         |
| i-Inositol                                                                | 40        | 180.2     | 36           |
| <b>Inorganic Salts</b>                                                    |           |           |              |
| Ferric Nitrate (Fe(NO <sub>3</sub> ) <sub>3</sub> ·9H <sub>2</sub> O)     | 0.25      | 404       | 0.5          |
| Potassium Chloride (KCl)                                                  | 5360      | 74.55     | 1997.9       |
| Sodium Bicarbonate (NaHCO <sub>3</sub> )                                  | 880       | 84        | 369.6        |
| Sodium Chloride (NaCl)                                                    | 89000     | 58        | 25810        |
| Sodium Phosphate dibasic (Na <sub>2</sub> HPO <sub>4</sub> )<br>anhydrous | 906       | 120       | 543.6        |
| Zinc sulfate (ZnSO <sub>4</sub> ·7H <sub>2</sub> O)                       | 0.67      | 287.56    | 0.9633       |
| <b>Other Components</b>                                                   |           |           |              |
| D-Glucose (Dextrose)                                                      | 25000     | 180.2     | 22525        |
| Sodium Pyruvate                                                           | 227       | 110.04    | 124.9        |
| MOPS                                                                      | 10000     | 269.3     | 13465        |

**SI Table 4. Antibodies used in the study. Related to STAR Methods.** AF: Alexa Fluor, PE: Phycoerythrin, BV: Brilliant Violet, SA: Streptavidin

| Antibody               | Class | Host species | Dilution (FACS) | Dilution (in vitro) | Dilution (in vivo) | Source        | Catalogue number |
|------------------------|-------|--------------|-----------------|---------------------|--------------------|---------------|------------------|
| Anti-Olig2             | IgG   | Rabbit       | -               | 1:1000              | 1:500              | Millipore     | AB9610           |
| Anti-Sox10             | IgG   | Goat         | -               | 1:100               | 1:100              | Santa Cruz    | sc-17342         |
| Anti-Pdgfra            | IgG   | Rat          | -               | 1:300               | -                  | BD Pharmingen | 558774           |
| Anti-NG2               | IgG   | Rabbit       | -               | 1:500               | -                  |               | MAB5320          |
| Anti-A2B5              | IgM   | Mouse        | -               | 1:500               | -                  | Millipore     | MAB312           |
| Anti-Ki67              | IgG   | Rabbit       | -               | -                   | 1:500              | Abcam         | Ab166667         |
| Anti-CC1 (APC)         | IgG   | Mouse        | -               | -                   | 1:300              | Calbiochem    | OP80             |
| Anti-O4                | IgM   | Mouse        | -               | 1:1000              | -                  | R&D Systems   | PZO              |
| Anti-CNPase            | IgG   | Mouse        | -               | 1:1000              | -                  | Abcam         | Ab6319           |
| Anti-MBP               | IgG   | Rat          | -               | 1:500               | -                  | Serotec       | MCA4095          |
| Anti-Nkx2.2            | IgG   | Mouse        | -               | -                   | 1:200              | DHSB          | 745A5            |
| Anti-Cd11b/c           | IgG   | Mouse        | -               | 1:200               | -                  | Serotec       | MCA275R          |
| Anti-GFAP              | IgG   | Goat         | -               | 1:2000              | -                  | Abcam         | Ab53554          |
| Anti-A2B5-PE           | IgM   | Mouse        | 1:10            | -                   | -                  | Milteny       | 105HB29          |
| Mouse IgM-PE           | IgM   | Mouse        | 1:10            | -                   | -                  | Milteny       | IS5-20C4         |
| Anti-MOG-Biotin        | IgG   | Goat         | 1:40            | -                   | -                  | R&D Systems   | BAF2439          |
| IgG-biotin Control     | IgG   | Donkey       | 1:40            | -                   | -                  |               |                  |
| Anti-Cd11b-PerCP-Cy5.5 | IgG   | Mouse        | 1:1000          | -                   | -                  | Biolegend     | Ox-42            |
| Mouse IgG-PerCP-Cy5.5  | IgG   | Mouse        | 1:1000          | -                   | -                  | Biolegend     | MOPC1-73         |
| SA-BV421               | -     | -            | 1:800           | -                   | -                  | Biolegend     | 405226           |
| Anti-Mouse AF-488      | IgG   | Donkey       | -               | 1:1000              | 1:500              | Invitrogen    | A21202           |
| Anti-Mouse AF-594      | IgG   | Donkey       | -               | 1:1000              | 1:500              | Invitrogen    | A21203           |
| Anti-Mouse AF-488      | IgM   | Goat         | -               | 1:1000              | 1:500              | Invitrogen    | A21042           |

|                       |         |        |   |        |       |            |        |
|-----------------------|---------|--------|---|--------|-------|------------|--------|
| Anti-Mouse<br>AF-647  | IgG     | Donkey | - | 1:1000 | 1:500 | Invitrogen | A31571 |
| Anti-Rabbit<br>AF-488 | IgG     | Donkey | - | 1:1000 | 1:500 | Invitrogen | A21206 |
| Anti-Rabbit<br>AF-594 | IgG     | Donkey | - | 1:1000 | 1:500 | Invitrogen | A21207 |
| Anti-Rabbit<br>AF-647 | IgG     | Donkey | - | 1:1000 | 1:500 | Invitrogen | A21447 |
| Anti-Rat<br>488       | IgG AF- | Donkey | - | 1:1000 | 1:500 | Invitrogen | A21208 |
| Anti-Rat<br>594       | IgG AF- | Donkey | - | 1:1000 | 1:500 | Invitrogen | A21209 |
| Anti-Goat<br>488      | IgG AF- | Donkey | - | 1:1000 | 1:500 | Invitrogen | A11055 |
| Anti-Goat<br>647      | IgG AF- | Donkey | - | 1:1000 | 1:500 | Invitrogen | A21147 |

| Antbodies for<br>Western Blot | Class | Host<br>species | Dilution<br>(WB) |  | Source     | Catalogue<br>number |
|-------------------------------|-------|-----------------|------------------|--|------------|---------------------|
| Anti-AMPK                     | IgG   | Mouse           | 1:1000           |  | Abcam      | Ab80039             |
| Anti-phospho-<br>AMPK         | IgG   | Rabbit          | 1:1000           |  | CST        | 2353                |
| Anti-p70S6k                   | IgG   | Rabbit          | 1:1000           |  | CST        | 9202                |
| Anti-phospho-<br>p70S6K       | IgG   | Rabbit          | 1:1000           |  | CST        | 9205                |
| Anti-S6                       | IgG   | Mouse           | 1:1000           |  | CST        | 2317                |
| Ribosomal Proten              |       |                 |                  |  |            |                     |
| Anti-phospho-S6               | IgG   | Rabbit          | 1:1000           |  | CST        | 4858                |
| Anti-PGC1a                    | IgG   | Mouse           | 1:1000           |  | Calbiochem | ST1202              |
| Anti-beta-actin-<br>HRP       | IgG   | Mouse           | 1:20000          |  | Sigma      | A3854               |
| IRDye680 LT anti-<br>mouse    | IgG   | Donkey          | 1:10000          |  | Li-Cor     | 926_68022           |
| IRDye680 LT anti-<br>rabbit   | IgG   | Donkey          | 1:10000          |  | Li-Cor     | 926_38073           |
| IRDye800CW<br>anti-rabbit     | IgG   | Donkey          | 1:10000          |  | Li-Cor     | 926_32212           |
| IRDye800CW<br>anti-mouse      | IgG   | Donkey          | 1:10000          |  | Li-Cor     | 926_32213           |
| Anti-Mouse-IgG-<br>HRP        | IgG   | Horse           | 1:1000           |  | CST        | 7076                |

**SI Table 5. qRT primer sequences used in this study. Related to STAR methods.** All primers were purchased from Sigma except Cdkn2a, which was designed using Primer3.

| Gene   | Forward primer sequence (5'-3') | Reverse primer sequence (5'-3') | Source     |
|--------|---------------------------------|---------------------------------|------------|
| Pdgfra | GAGATTATGAATGTGCTGCC            | TTTCTCGTGAACAGAAATGC            | Sigma      |
| Ascl1  | AAACAAGGGAAGAGGAAAAG            | CATTGAATCTAAGTCCTGGTG           | Sigma      |
| Sox6   | TCCCAATTTTTCCACATGAC            | GTTATCACCTGGCTTGTATG            | Sigma      |
| Enpp6  | AATTTGTCTCTCCTTTGACC            | CTTTCTGGACATCAGATAGC            | Sigma      |
| Cnp1   | TTTCAAGAAAGAGCTTCGAC            | TAAGATCTCCTCACCACATC            | Sigma      |
| Cdkn2a | TCGTGCGGTATTTGCGGTAT            | TAGTCTCGCGTTGCCAGAAG            | This study |
| Tbp    | CATCATGAGAATAAGAGAGCC           | GGATTGTTCTTCACTTTGG             | Sigma      |
| Prkaa2 | ccaaattatgcagcaccggag           | acgtgctcatcgtcgaacg             | This study |
